# Supplementary material for: A High Incidence of Sperm with Cytoplasmic Droplets Affects the Response to Bicarbonate in Preserved Boar Semen
Source: MDPI journal article supplement (doi:10.3390/ani11092570), 2021-08-31
Supplement: s1 [file s1]

## Supplemental Table 2

*Spearman rank correlation coefficients for selected sperm parameters measured after 24 hours storage at 17 °C (n = 78).*

| Response in medium...  | Morphological abnormal spermatozoa (%) | Proximal & distal cytoplasmic droplets (%) | Proximal cytoplasmic droplets (%) | Distal cytoplasmic droplets (%) | PI & PNA-FITC negative (%) | Total motility (%) | Progressive motility (%) |
|------------------------|----------------------------------------|--------------------------------------------|-----------------------------------|---------------------------------|----------------------------|--------------------|--------------------------|
| Tyr <sub>BicCa</sub>   | -0.74**                                | -0.69**                                    | -0.58**                           | -0.53**                         | 0.20                       | 0.17               | 0.13                     |
| Tyr <sub>Ca</sub>      | 0.07                                   | -0.07                                      | -0.10                             | -0.05                           | -0.24                      | -0.44**            | -0.35**                  |
| Tyr <sub>Control</sub> | -0.07                                  | -0.15                                      | -0.12                             | -0.15                           | -0.42**                    | -0.31**            | -0.21                    |

\*\* P < 0.01

PI = propidium iodide

PNA-FITC = peanut agglutinin conjugated with fluorescein isothiocyanate
