# Supplementary material for: A High Incidence of Sperm with Cytoplasmic Droplets Affects the Response to Bicarbonate in Preserved Boar Semen
Source: MDPI journal article supplement (doi:10.3390/ani11092570), 2021-08-31
Supplement: s1 [file s1]

**A**

|                        |        | Viable, low calcium      |                          | Viable, high calcium    |                         | Non-viable               |                         |
|------------------------|--------|--------------------------|--------------------------|-------------------------|-------------------------|--------------------------|-------------------------|
|                        |        | ≤ 15 %                   | > 15 %                   | ≤ 15 %                  | > 15 %                  | ≤ 15 %                   | > 15 %                  |
|                        |        | droplets*                | droplets**               | droplets*               | droplets**              | droplets*                | droplets**              |
| Tyr <sup>BicCa</sup>   | 3 min  | 81.4 ± 6.7               | 83.3 ± 3.7               | 6.7 ± 3.3               | 5.7 ± 1.8               | 11.9 ± 5.0               | 11.0 ± 3.2              |
|                        | 60 min | 24.3 ± 11.7 <sup>a</sup> | 47.4 ± 12.3 <sup>b</sup> | 29.7 ± 8.7 <sup>a</sup> | 20.1 ± 7.6 <sup>b</sup> | 45.9 ± 11.1 <sup>a</sup> | 32.5 ± 8.2 <sup>b</sup> |
| Tyr <sup>Ca</sup>      | 3 min  | 81.2 ± 6.8               | 83.3 ± 4.6               | 6.8 ± 3.5               | 5.8 ± 2.0               | 12.0 ± 4.8               | 10.9 ± 3.6              |
|                        | 60 min | 71.9 ± 10.9              | 75.9 ± 8.1               | 12.0 ± 6.6              | 8.9 ± 4.4               | 16.1 ± 7.3               | 15.2 ± 5.6              |
| Tyr <sup>Control</sup> | 3 min  | 85.2 ± 5.7               | 86.5 ± 3.4               | 2.9 ± 2.0               | 2.0 ± 0.7               | 11.9 ± 5.0               | 11.5 ± 3.1              |
|                        | 60 min | 80.3 ± 7.7               | 83.5 ± 5.6               | 4.2 ± 2.9               | 2.9 ± 2.0               | 15.5 ± 6.6               | 13.6 ± 4.5              |

\* n=66 boars, \*\* n=12 boars

**B**

|                        |        | Viable, low calcium      |                         | Viable, high calcium    |                        | Non-viable  |             |
|------------------------|--------|--------------------------|-------------------------|-------------------------|------------------------|-------------|-------------|
|                        |        | ≤ 15 %                   | > 15 %                  | ≤ 15 %                  | > 15 %                 | ≤ 15 %      | > 15 %      |
|                        |        | droplets*                | droplets**              | droplets*               | droplets**             | droplets*   | droplets**  |
| Tyr <sup>BicCa</sup>   | 3 min  | 70.9 ± 14.9 <sup>a</sup> | 80.2 ± 5.5 <sup>b</sup> | 13.4 ± 7.6 <sup>a</sup> | 8.0 ± 2.9 <sup>b</sup> | 15.8 ± 9.0  | 11.7 ± 3.4  |
|                        | 60 min | 16.8 ± 10.5              | 22.4 ± 13.8             | 27.5 ± 8.9              | 23.1 ± 5.3             | 55.6 ± 11.6 | 54.4 ± 13.2 |
| Tyr <sup>Ca</sup>      | 3 min  | 72.5 ± 16.2 <sup>a</sup> | 80.9 ± 6.3 <sup>b</sup> | 12.5 ± 8.4              | 7.7 ± 3.4              | 14.9 ± 9.5  | 11.4 ± 3.8  |
|                        | 60 min | 48.8 ± 20.2              | 49.3 ± 25.2             | 22.9 ± 10.3             | 17.9 ± 5.6             | 28.2 ± 16.1 | 32.8 ± 21.8 |
| Tyr <sup>Control</sup> | 3 min  | 79.8 ± 9.6 <sup>a</sup>  | 85.5 ± 4.7 <sup>b</sup> | 5.3 ± 3.1 <sup>a</sup>  | 3.0 ± 1.1 <sup>b</sup> | 15.0 ± 9.0  | 11.5 ± 4.1  |
|                        | 60 min | 70.6 ± 14.4              | 61.5 ± 27.9             | 6.7 ± 3.4               | 7.1 ± 4.0              | 22.6 ± 13.9 | 31.4 ± 24.3 |

\* n = 66 boars, \*\* n = 12 boars

**Supplemental Table 1***Cell populations from the calcium influx assay.*

A + B) Sperm populations in different media after A) 24 hours or B) 96 hours semen storage for samples with ≤ 15 % spermatozoa with cytoplasmic droplets (n = 66 boars) or > 15 % spermatozoa with cytoplasmic droplets (n = 12 boars). Spermatozoa were incubated in either a capacitating medium with 15 mM bicarbonate and 2 mM calcium (Tyr<sup>BicCa</sup>) or non-capacitating variants with either 2 mM calcium (Tyr<sup>Ca</sup>) or 1 mM EGTA (Tyr<sup>Control</sup>). Cells were identified based on propidium iodide staining as either non-viable (PI-positive) or viable (PI-negative). Fluo-3 was used to further subdivide the viable sperm population in cells with a low Fluo-3 fluorescence intensity (=low free intracellular calcium concentration) and cells with a higher Fluo-3-fluorescence intensity (= high free intracellular calcium concentration). Different small letters (a-b) indicate significant differences between samples with ≤ 15 % or > 15 % spermatozoa with cytoplasmic droplets (P < 0.05).
